# Supplementary material for: Surface plasmon resonance-based immunoassay for human C-reactive protein
Source: Royal Society of Chemistry journal article supplement (doi:10.1039/c5an00690b), 2015-01-01
Supplement: c5an00690b1.pdf [file c5an00690b1.pdf]

## **Surface plasmon resonance-based immunoassay for human C- reactive protein**

*Sandeep Kumar Vashist<sup>a,b</sup>, E. Marion Schneider<sup>c</sup>, John H.T. Luong<sup>d</sup>*

<sup>a</sup>HSG-IMIT - Institut für Mikro- und Informationstechnik, Georges-Koehler-Allee 103, 79110 Freiburg, Germany.

<sup>b</sup>Laboratory for MEMS Applications, Department of Microsystems Engineering - IMTEK, University of Freiburg, Georges-Koehler-Allee 103, 79110 Freiburg, Germany

<sup>c</sup>Sektion Experimentelle Anaesthesiologie, University Hospital Ulm, Albert Einstein Allee 23; 89081 Ulm, Germany

<sup>d</sup>Innovative Chromatography Group, Irish Separation Science Cluster (ISSC), Department of Chemistry and Analytical, Biological Chemistry Research Facility (ABCRF), University College Cork, Cork, Ireland

\*Corresponding author e-mail: sandeep.kumar.vashist@hsg-imit.de; Tel.: +49 761 2037252; Fax: +49 761 20373299

### **Direct Ab immobilization procedure (without Pr A/G)**

A SPR Au chip was hydroxylated by treatment with 90  $\mu\text{L}$  of 1% (w/v) KOH for 5 min followed by extensive washing with ultrapure water (UPW). The EDC-activated anti-human CRP Ab was prepared by incubating anti-human CRP Ab (990  $\mu\text{L}$ , 0.100 mg  $\text{mL}^{-1}$ ) with EDC (10  $\mu\text{L}$ , 4 mg  $\text{mL}^{-1}$  in 0.1 M MES, pH 4.7) for 15 min at room temperature (RT). The EDC-activated anti-human CRP Ab was admixed in 1% (v/v) APTES (in the ratio of 1:1 v/v) and the resulting solution (90  $\mu\text{L}$ ) was injected over the KOH-treated Au SPR chip. After 30 min of incubation at RT in a fume hood, the Ab-functionalized SPR chip was washed extensively with HBS, docked into BIAcore 3000 and then primed. Thereafter, 20  $\mu\text{L}$  of 1% (w/v) BSA was injected at 10  $\mu\text{L min}^{-1}$  to block the non-specific protein binding sites on the anti-human CRP Ab-functionalized chip.

### **Previously developed multistep Ab immobilization procedure based on covalent binding of Pr A**

#### *Surface cleaning of SPR Au chip (SIA kit) and APTES functionalization*

The Au chip was cleaned with Piranha etch [60  $\mu\text{L}$  of  $\text{H}_2\text{SO}_4$  (97.5%, v/v): 30  $\mu\text{L}$  of  $\text{H}_2\text{O}_2$  (30%, v/v)] for 2 min followed by extensive washing with UPW. The chip was then incubated with 100  $\mu\text{L}$  of 2% (v/v) APTES for 1 h at RT in a fume hood followed by five washings with UPW.

#### *EDC activation of Pr A*

Pr A (990  $\mu\text{L}$  of 100  $\mu\text{g/mL}$  in HBS) was incubated at RT for 15 min with 10  $\mu\text{L}$  of a cross-linking solution containing EDC (4 mg/mL) and sulfo-NHS (11 mg/mL) in 0.1 M MES buffer, pH 4.7. It leads to the activation of carboxyl groups on Pr A with EDC.

### *Antibody immobilization procedure*

EDC-activated Pr A (50  $\mu$ L, 0.100 mg/mL) was injected over all four flow cells of an APTES-functionalized Au chip at 10  $\mu$ L/min until the baseline was stabilized. This leads to the covalent binding of EDC-activated Pr A on the APTES-functionalized Au chip. Thereafter, 50  $\mu$ L of anti-human CRP Ab (0.100 mg/mL) diluted in 10 mM HBS, pH 7.4 was injected over all flow cells at 10  $\mu$ L/min. Non-specific binding sites on the Ab-bound chip were then blocked by injecting 20  $\mu$ L of 1% (w/v) BSA at 10  $\mu$ L/min.

### **Covalent Ab immobilization procedure on CM5-dextran chip<sup>1</sup>**

A CM5 dextran-functionalized Au chip was docked into the BIAcore 3000 system and primed. The optimum pH of sodium acetate buffer for Ab immobilization, determined by pre-concentration studies, was 4.2. The CM5-dextran chip was activated by injecting a 50  $\mu$ L cross-linking solution, containing 200  $\mu$ g of EDC and 550  $\mu$ g of sulfo-NHS in 0.1M MES buffer, pH 4.7, through all the flow cells at 10  $\mu$ L/min. Thereafter, 50  $\mu$ L of anti-human CRP Ab (0.100 mg/mL) was injected into the four flow cells of the APTES-functionalized Au chip at 10  $\mu$ L/min and the baseline was allowed to stabilize. Non-specific binding sites on the chip were then blocked by consecutive injection of 20  $\mu$ L of 1 M ethanolamine hydrochloride, pH 8.5 and 20  $\mu$ L of 1% (w/v) BSA at 10  $\mu$ L/min. Ethanolamine hydrochloride blocked unreacted ester groups of the CM5-dextran matrix, while BSA blocked non-specific binding sites on the chip surface.

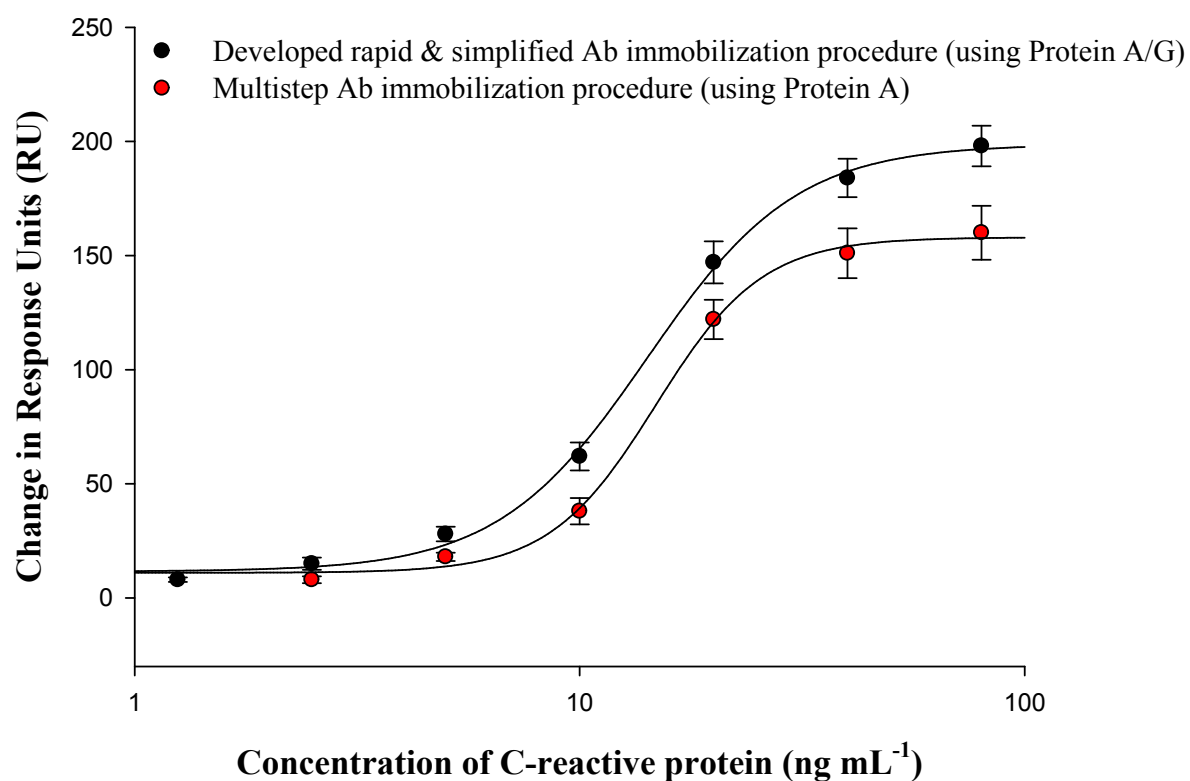

**Fig. S1.** Comparison of the SPR-based CRP IAs performed using the developed rapid and highly-simplified Ab immobilization procedure using Pr A/G and our previously reported multistep Ab immobilization procedure using Pr A. All experiments were performed in triplicate with the error bars representing the standard deviation.

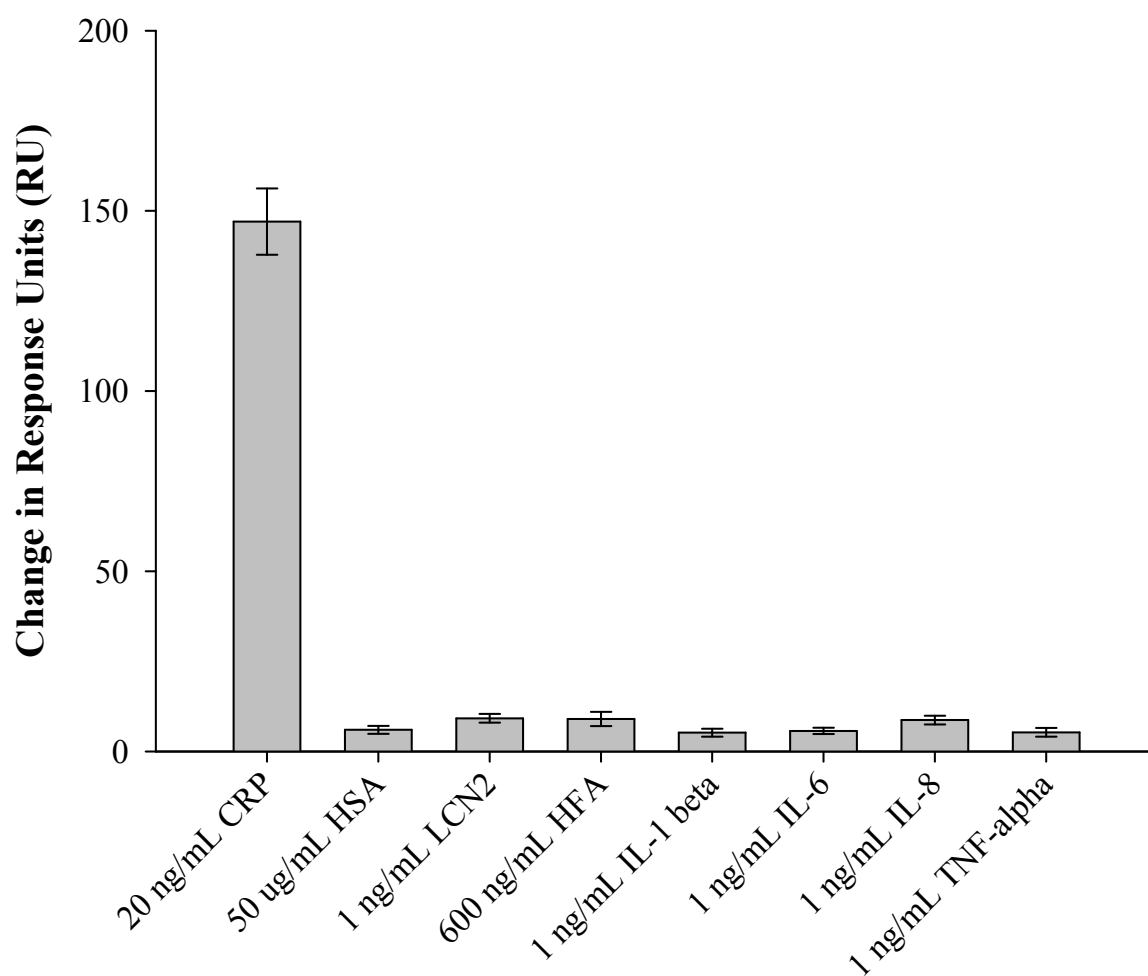

**Fig. S2.** Specific binding of human CRP by the developed SPR IA in comparison to the non-specific control proteins at relatively high concentrations compared to their physiological levels: human serum albumin (HSA), human lipocalin-2 (LCN2), human fetuin A (HFA), interleukin (IL)-1 beta, IL-6, IL-8 and tumor necrosis factor (TNF)-alpha. All experiments were done in triplicate with the error bars representing the standard deviation.

## REFERENCES

- (1) Vashist S. K.; Dixit, C. K.; MacCraith, B. D.; O’Kennedy, R. *Analyst* 2011, 136, 4431-4435.
